# Supplementary material for: A Real-Time Artificial Intelligence-Assisted System to Predict Weaning from Ventilator Immediately after Lung Resection Surgery
Source: MDPI journal article supplement (doi:10.3390/ijerph18052713), 2021-03-08
Supplement: s1 [file s1]

**Table S1.** Judgment criteria for binary classification of feature.

| Feature |                                                           | 0                                                                                               | 1                                                                                                                                                                                                                                                           |
|---------|-----------------------------------------------------------|-------------------------------------------------------------------------------------------------|-------------------------------------------------------------------------------------------------------------------------------------------------------------------------------------------------------------------------------------------------------------|
| 1       | Estimated postoperative lung function                     | Estimated ppoDLCO >40 and ppoFEV1 >40                                                           | Estimated ppoDLCO <40 or ppoFEV1 <40                                                                                                                                                                                                                        |
| 2       | Severe CAD                                                | None                                                                                            | Patients who had received multiple coronary stent implantation or coronary artery bypass graft surgery before, patients who had unstable angina, thallium patients in whom scan or treadmill showed positive coronary ischemia, or congestive heart failure |
| 3       | Exercise loading                                          | Patient can climb more than 2 floors without resting in between, or can walk for over 6 minutes | Patient can neither climb more than 2 floors without resting in between nor walk for over 6 minutes                                                                                                                                                         |
| 4       | Desaturation: current balance of oxygen supply and demand | Current resting oxygen saturation >94% under room air                                           | Current resting oxygen saturation $\leq$ 94% under room air                                                                                                                                                                                                 |
| 5       | Major diseases                                            | Non                                                                                             | Liver failure, renal failure, morbid obesity (body mass index $\geq$ 35 Kg/m <sup>2</sup> ), or neuromuscular disease that causes weakness such as myasthenia gravis                                                                                        |
| 6       | History of smoking                                        | Never                                                                                           | Had history of smoking                                                                                                                                                                                                                                      |
| 7       | Smoking cessation                                         | Never smoking, or cease smoking for more than 4 weeks before lung resection surgery             | Still smoking before lung resection surgery                                                                                                                                                                                                                 |
| 8       | Current age                                               | <70 years                                                                                       | $\geq$ 70 years                                                                                                                                                                                                                                             |
| 9       | Muscle relaxant reversal agent used                       | neostigmine                                                                                     | sugammadex                                                                                                                                                                                                                                                  |

**Table S2.** Hyper-parameters range for experiments.

| Method and Hyper-parameter | Values                                |
|----------------------------|---------------------------------------|
| Logistic regression        |                                       |
| penalty                    | l1, l2                                |
| C                          | 0.001, .009, 0.01, .09, 1, 1.2, 5, 15 |
| max_iter                   | 10, 30, 50, 100, 1000                 |
| Random forest              |                                       |
| n_estimators               | 250, 300, 500, 700, 750               |
| max_depth                  | 15, 30, 50                            |
| min_samples_split          | 2, 4, 6, 10                           |
| SVM                        |                                       |
| kernel                     | rbf, linear                           |
| gamma                      | scale, 1e-3, 1e-4                     |
| C                          | 1, 2, 5, 10, 100, 1000                |
| decision_function_shape    | ovo, ovr                              |
| shrinking                  | True, False                           |
| LightGBM                   |                                       |
| learning_rate              | 1e-4, 1e-3, 1e-2                      |
| num_iterations             | 200, 500, 700, 950                    |

|                        |                                                                  |
|------------------------|------------------------------------------------------------------|
| max_depth              | 12, 15, 30, 50                                                   |
| random_state           | 8, 16, 42                                                        |
| XGBoost                |                                                                  |
| learning_rate          | 1e-4, 1e-3, 1e-2                                                 |
| gamma                  | 1e-2, 1e-3, 1e-4, 1e-5                                           |
| num_iterations         | 200, 500, 700, 950                                               |
| max_depth              | 15, 30, 50                                                       |
| num_parallel_tree      | 2, 5                                                             |
| MLPClassifier          |                                                                  |
| hidden_layer_sizes     | (100), (100,55), (90,60), (200,150,50)                           |
| learning_rate_init     | 1e-2, 1e-3                                                       |
| early_stopping         | True, False                                                      |
| Naïve Bayes Classifier |                                                                  |
| var_smoothing          | 2e-9, 1e-09, 1e-06, 1e-04, 1e-02, 1e-01,<br>0.2, 0.25, 0.3, 0.35 |

The hyper-parameters that are not described in this table are set to the default values used in the scikit-learn library.
